# Supplementary material for: Triclosan has a robust, yet reversible impact on human gut microbial composition in vitro
Source: PLoS One. 2020 Jun 25;15(6):e0234046. doi: 10.1371/journal.pone.0234046 (PMC7316517; doi:10.1371/journal.pone.0234046)
Supplement: S3 Table — (XLSX) [file pone.0234046.s010.xlsx]

## Sheet: Sheet1
SampleID	Copy number per µL DNA
Inoculum	1090000000
Day13.Ac1.L	591000000
Day 13.Tc1.L	119000000
Day 13.Dc1.L	33200000
Day13.Ac2.L	1650000000
Day13.Tc2.L	114000000
Day13.Dc2.L	64200000
Day13.Ac3.L	4710
Day13.Tc3.L	380000000
Day13.Dc3.L	76200000
Day13.Ac1.M	61100000
Day13.Tc1.M	7310000
Day13.Dc1.M	90100
Day13.Ac2.M	55900000
Day13.Tc2.M	27100000
Day13.Dc2.M	6320000
Day13.Ac3.M	51500000
Day13.Tc3.M	18200000
Day13.Dc3.M	4500000
Day15.Ac1.L	913000000
Day15.Tc1.L	66300000
Day15.Dc1.L	16900000
Day15.Ac2.L	2680000000
Day15.Tc2.L	64500000
Day15.Dc2.L	270000000
Day15.Ac3.L	633000000
Day15.Tc3.L	1660000000
Day15.Dc3.L	18100000
Day15.Ac1.M	124000000
Day15.Tc1.M	1260000
Day15.Dc1.M	17200000
Day15.Ac2.M	73700000
Day15.Tc2.M	26200000
Day15.Dc2.M	15200000
Day15.Ac3.M	35800000
Day15.Tc3.M	77300000
Day15.Dc3.M	32600000
Day17.Ac1.L	3810000000
Day17.Tc1.L	187000000
Day17.Dc1.L	62900000
Day17.Ac2.L	2250000000
Day17.Tc2.L	636000000
Day17.Dc2.L	42700000
Day17.Ac3.L	900000000
Day17.Tc3.L	3560000000
Day17.Dc3.L	5430000
Day17.Ac1.M	15900000
Day17.Tc1.M	2360000
Day17.Dc1.M	2400000
Day17.Ac2.M	11200000
Day17.Tc2.M	19300000
Day17.Dc2.M	5280000
Day17.Ac3.M	97200000
Day17.Tc3.M	40600000
Day17.Dc3.M	21100000
Day21.Ac1.L	141000000
Day21.Tc1.L	2690000
Day21.Dc1.L	37700000
Day21.Ac2.L	116000000
Day21.Tc2.L	49200000
Day21.Dc2.L	18700000
Day 21.Ac3.L	19300000
Day21.Tc3.L	47000000
Day21.Dc3.L	150000000
Day21.Ac1.M	5250000
Day21.Tc1.M	2000000
Day21.Dc1.M	390000
Day21.Ac2.M	387000000
Day21.Tc2.M	1820000
Day21.Dc2.M	3170000
Day21.Ac3.M	115000000
Day21.Tc3.M	27500000
Day21.Dc3.M	1900000
Day22.Ac1.L	142000000
Day22.Tc1.L	12500000
Day22.Dc1.L	11800000
Day22.Ac2.L	1640000000
Day22.Tc2.L	13100000
Day22.Dc2.L	12000000
Day22.Ac3.l	281000000
Day22.Tc3.L	74700000
Day22.Dc3.L	20900000
Day23.Ac1.L	4830
Day23.Tc1.L	10400000
Day23.Dc1.L	3630000
geneblock1	2340
geneblock2	2210
DNAfreewater1	4980
DNAfreewater2	3140
Day23.Ac2.L	465000000
Day23.Tc2.L	18500000
Day23.Dc2.L	618000
Day23.Ac3.L	9490
Day23.Tc3.L	43400000
Day23.Dc3.L	29700000
Day24.Ac1.L	306000000
Day24.Tc1.L	3380000
Day24.Dc1.L	8330000
Day24.Ac2.L	5480
Day24.Tc2.L	73200000
Day24.Dc2.L	15500000
Day24.Ac3.L	293000000
Day24.Tc3.L	68000000
Day24.Dc3.L	10700000
Day24.Ac1.M	11600000
Day24.Tc1.M	3020000
Day24.Dc1.M	16300
Day24.Ac2.M	6030000
Day24.Tc2.M	151000
Day24.Dc2.M	137000
Day24.Ac3.M	109000000
Day24.Tc3.M	119000
Day24.Dc3.M	707000
Day25.Ac1.L	2420000000
Day25.Tc1.L	41600000
Day25.Dc1.L	190000
Day25.Ac2.L	1100000000
Day25.Tc2.L	31000000
Day25.Dc2.L	4640000
Day25.Ac3.L	102000000
Day25.Tc3.L	171000000
Day25.Dc3.L	22400000
Day26.Ac1.L	255000000
Day26.Tc1.L	13200000
Day26.Dc1.L	8620000
Day26.Ac2.L	222000000
Day26.Tc2.L	10400000
Day26.Dc2.L	5050000
Day26.Ac3.L	170000000
Day26.Tc3.L	70000000
Day26.Dc3.L	11000000
Day27.Ac1.L	347000000
Day27.Tc1.L	14600000
Day27.Dc1.L	3270000
Day27.Ac2.L	138000000
Day27.Tc2.L	8600000
Day27.Dc2.L	3540000
Day27.Ac3.L	90200000
Day27.Tc3.L	22500000
Day27.Dc3.L	9680000
Day27.Ac1.M	78100000
Day27.Tc1.M	1500000
Day27.Dc1.M	565000
Day27.Ac2.M	3610000
Day27.Tc2.M	448000
Day27.Dc2.M	944000
Day27.Ac3.M	41300000
Day27.Tc3.M	5280000
Day27.Dc3.M	2420000
Day28.Ac1.L	157000000
Day28.Tc1.L	6770
Day28.Dc1.L	15300000
Day28.Ac2.L	4500
Day28.Tc2.L	9550000
Day28.Dc2.L	1110000
Day28.Ac3.L	284000000
Day28.Tc3.L	47500000
Day28.Dc3.L	6290000
Day29.Ac1.L	7010
Day29.Tc1.L	28000000
Day29.Dc1.L	1170000
Day29.Ac2.L	3240000
Day29.Tc2.L	3930000
Day29.Dc2.L	4480000
Day29.Ac3.L	506000
Day29.Tc3.L	388000
Day29.Dc3.L	2130000
Day29.Ac1.M	53400000
Day29.Tc1.M	187000
Day29.Dc1.M	1750000
Day29.Ac2.M	1180000
Day29.Tc2.M	1120000
Day29.Dc2.M	229000
Day29.Ac3.M	231000000
Day29.Tc3.M	2080000
Day29.Dc3.M	1330000
Day30.Ac1.L	1110000000
Day30.Tc1.L	77100000
Day30.Dc1.L	31600000
Day30.Ac2.L	11400000
Day30.Tc2.L	11700000
Day30.Dc2.L	10800000
Day30.Ac3.L	66700
Day30.Tc3.L	96700000
Day30.Dc3.L	3580000
Day31.Ac1.L	352000000
Day31.Tc1.L	42400000
Day31.Dc1.L	6110000
Day31.Ac2.L	2530000
Day31.Tc2.L	296000
Day31.Dc2.L	5050000
Day31.Ac3.L	422000
Day31.Tc3.L	16100000
Day31.Dc3.L	8740000
Day31.Ac1.M	75000000
Day31.Tc1.M	7670000
Day31.Dc1.M	176000
Day31.Ac2.M	59600000
Day31.Tc2.M	12700000
Day31.Dc2.M	4390000
Day31.Ac3.M	37000000
Day31.Tc3.M	40300000
Day31.Dc3.M	13500000
Day32.Ac1.L	623000000
Day32.Tc1.L	63100000
Day32.Dc1.L	48900000
Day32.Ac2.L	21500000
Day32.Tc2.L	6460000
Day32.Dc2.L	2470000
Day32.Ac3.L	4010000
Day32.Tc3.L	1500000
Day32.Dc3.L	721000
Day33.Ac1.L	725000000
Day33.Tc1.L	52900000
Day33.Dc1.L	2000000
Day33.Ac2.L	7000000
Day33.Tc2.L	923000
Day33.Dc2.L	13900000
Day33.Ac3.L	5180000
Day33.Tc3.L	11000000
Day33.Dc3.L	1770000
Day34.Ac1.L	450000000
Day34.Tc1.L	70800000
Day34.Dc1.L	819000
Day34.Ac2.L	8540000
Day34.Tc2.L	25800000
Day34.Dc2.L	1400000
Day34.Ac3.L	1100000
Day34.Tc3.L	6500000
Day34.Dc3.L	570000
Day34.Ac1.M	28600000
Day34.Tc1.M	773000
Day34.Dc1.M	875000
Day34.Ac2.M	30900000
Day34.Tc2.M	1940000
Day34.Dc2.M	835000
Day34.Ac3.M	5890000
Day34.Tc3.M	17800000
Day34.Dc3.M	10600000
Day36.Ac1.L	536000000
Day36.Tc1.L	14500000
Day36.Dc1.L	22400000
Day36.Ac2.L	4890000
Day36.Tc2.L	44900000
Day36.Dc2.L	19700000
Day36.Ac3.L	4050000
Day36.Tc3.L	6880000
Day36.Dc3.L	13200000
Day36.Ac1.M	8680000
Day36.Tc1.M	2060000
Day36.Dc1.M	1160000
Day36.Ac2.M	36200000
Day36.Tc2.M	41400000
Day36.Dc2.M	33600000
Day36.ac3.M	15900000
Day36.Tc3.M	42900000
Day36.Dc3.M	20800000
Day41.Ac1.L	296000000
Day41.Tc1.L	37700000
Day41.Dc1.L	26000000
Day41.Ac2.L	12900000
Day41.Tc2.L	1880000
Day41.Dc2.L	901000
Day41.Ac3.L	26800000
Day41.Tc3.L	613000
Day41.Dc3.L	125000
Day41.Ac1.M	3700000
Day41.Tc1.M	57800
Day41.Dc1.M	2080
Day41.Ac2.M	27200000
Day41.Tc2.M	5620000
Day41.Dc2.M	5940000
Day41.Ac3.M	319000
Day41.Tc3.M	2960000
Day41.Dc3.M	1950
Day45.Ac1.L	4310
Day45.Tc1.L	981
Day45.Dc1.L	706000
Day45.Ac2.L	9700000
Day45.Tc2.L	133000
Day45.Dc2.L	147000
Day45.Ac3.L	29600000
Day45.Tc3.L	4890000
Day45.Dc3.L	26600
Day45.Ac1.M	1260000
Day45.Tc1.M	32300
Day45.Dc1.M	130000
Day45.Ac2.M	991000
Day45.Tc2.M	66700
Day45.Dc2.M	21200
Day45.Ac3.M	245000
Day45.Tc3.M	491000
Day45.Dc3.M	255000
Day49.Ac1.L	2270
Day49.Tc1.L	6430000
Day49.Dc1.L	729000
Day49.Ac2.L	32700000
Day49.Tc2.L	420000
Day49.Dc2.L	22800
Day49.Ac3.L	15100000
Day49.Tc3.L	13000000
Day49.Dc3.L	987
Day49.Ac1.M	60800
Day49.Tc1.M	5000
Day49.Dc1.M	29200
Day49.Ac2.M	2580000
Day49.Tc2.M	5400
Day49.Dc2.M	59200
Day49.Ac3.M	4200000
Day49.Tc3.M	24600
Day49.Dc3.M	147000
